# Supplementary material for: Fructose Mediated Non-Alcoholic Fatty Liver Is Attenuated by HO-1-SIRT1 Module in Murine Hepatocytes and Mice Fed a High Fructose Diet
Source: PLOS journal article supplement (doi:10.1371/journal.pone.0128648), 2015-06-22
Supplement: S1 (10.1371/journal.pone.0128648.s001) [file journal.pone.0128648.s001]

**The control groups not included in the figures of the main manuscript are listed below in this supplement:**

**Table A.**

**(Control groups from Figure 1: Hepatocytes)**

|  | **Units** | **CTR** | **CTR + CoPP** | **CTR + SnMP** |
| --- | --- | --- | --- | --- |
| **Figure 1A** | **Isoprostane (pg/ml)** | **7.6 ± 0.9** | **7.1 ± 0.8** | **7.7 ± 0.7** |
| **Figure 1B** | **Heme (pmol/mg protein)** | **154 ± 7.8** | **150 ± 8.3** | **159 ± 7.1** |
| **Figure 1C** | **Superoxide (DHE fluorescence unit)** | **23.1 ± 3.2** | **21.0 ± 3.6** | **25.0 ± 4.1** |
| **Figure 1D** | **HO-1 mRNA/GAPDH** | **2.0 ± 0.2** | **2.1 ± 0.3** | **2.0 ± 0.5** |
| **Figure 1E** | **SIRT1/actin** | **0.93 ± 0.1** | **0.89 ± 0.2** | **0.88 ± 0.2** |
| **Figure 1F** | **SIRT1/actin** | **0.86 ± 0.13** | **0.88 ± 0.16** | **0.85 ± 0.20** |

**Table B.**

**(Control groups from Figure 2: Hepatocytes)**

|  | **Units** | **CTR** | **CTR + CoPP** | **CTR + SnMP** | **CTR + GFP** | **CTR + GFP + CoPP** | **GFP + Fr** | **CTR +GFP + SnMP** | **Fr+**  **Scrambled** | **CTR + CoPP + Scrambled** | **CTR + SnMP + Scrambled** |
| --- | --- | --- | --- | --- | --- | --- | --- | --- | --- | --- | --- |
| **Figure 2A** | **pAMPK/**  **AMPK** | **1.36± 0.10** | **1.38± 0.21** | **1.39± 0.38** | **1.37± 0.25** | **1.35± 0.12** | **0.40± 0.10** | **1.39± 0.30** | **0.46± 0.12** | **1.33± 0.20** | **1.34± 0.31** |
| **Figure 2B** | **PPARα mRNA/**  **GAPDH** | **6.01 ± 0.4** | **6.21± 0.51** | **6.13± 0.58** | **6.54± 0.69** | **6.32± 0.55** | **2.22± 0.13** | **6.32± 0.61** | **2.10± 0.14** | **6.11± 0.54** | **6.09± 0.39** |
| **Figure 2C** | **FAS mRNA/**  **GAPDH** | **5.42 ± 0.41** | **5.33± 0.61** | **5.55± 0.44** | **5.41± 0.48** | **5.65± 0.51** | **9.12± 0.87** | **5.50± 0.37** | **9.23± 0.91** | **5.29± 0.66** | **5.32± 0.41** |
| **Figure 2D** | **Triglyceride (mg TG/mg protein)** | **0.043± 0.001** | **0.048± 0.002** | **0.041± 0.001** | **0.042± 0.001** | **0.051± 0.002** | **0.093± 0.005** | **0.044± 0.001** | **0.095± 0.006** | **0.046± 0.002** | **0.043± 0.002** |

**Table C.**

**(Control groups from Figure 3: Hepatocytes)**

|  | **Units** | **WT** | **WT + CoPP** | **WT + SnMP** |
| --- | --- | --- | --- | --- |
| **Figure 3A** | **Systolic Blood Pressure (mmHg)** | **116.0 ± 6.8** | **115.0 ± 7.1** | **118.0 ± 5.9** |
| **Figure 3B** | **Blood Glucose (mg/dl)** | **114.0 ± 9.1** | **110.0 ± 7.3** | **115.0 ± 8.9** |
| **Figure 3C** | **HOMA-IR** | **16.0 ± 1.3** | **15.0 ± 1.6** | **16.0 ± 1.7** |
| **Figure 3D** | **ALT (U/L)** | **23.0 ± 2.1** | **24.2 ± 2.3** | **25.2 ± 2.4** |
| **Figure 3E** | **Triglycerides (% of Control)** | **103.0 ± 6.1** | **104.0 ± 7.2** | **112.0 ± 7.3** |
| **Figure 3F** | **Cholesterol (% of Control)** | **102.0 ± 5.4** | **100.0 ± 6.3** | **103.0 ± 5.7** |

**Table D.**

**(Control groups from Figure 4: Hepatic Tissue)**

|  | **Units** | **WT** | **WT + CoPP** | **WT + SnMP** |
| --- | --- | --- | --- | --- |
| **Figure 4A** | **Oil Red O (490nm)** | **1.0 ± 0.09** | **1.1 ± 0.10** | **1.2 ± 0.07** |
| **Figure 4B** | **FFA (nmol/100mg liver tissue)±** | **52.0 ± 3.1** | **51.1 ± 3.3** | **51.8 ± 3.6** |
| **Figure 4C** | **Relative mRNA expression** | **1.0 ± 0.06** | **1.01 ± 0.03** | **1.02 ± 0.07** |
| **Figure 4D** | **Relative mRNA expression** | **1.0 ± 0.07** | **1.02 ± 0.04** | **1.01 ± 0.08** |

**Table E.**

**(Control groups from Figure 5: Hepatic Tissue)**

|  | **Units** | **WT** | **WT + CoPP** | **WT + SnMP** |
| --- | --- | --- | --- | --- |
| **Figure 5A** | **HO-1 mRNA/GAPDH** | **2.4 ± 0.07** | **2.2 ± 0.09** | **2.3 ± 0.08** |
| **Figure 5B** | **SIRT-1 mRNA/GAPDH** | **3.4 ± 0.10** | **3.1 ± 0.13** | **3.2 ± 0.15** |
| **Figure 5C** | **Plasma Isoprostanes (pg/ml)** | **4.8 ± 0.12** | **4.6 ± 0.16** | **4.9 ± 0.14** |
| **Figure 5D** | **Gp phox91/actin** | **0.61 ± 0.06** | **0.66 ± 0.07** | **0.59 ±0.05** |

**Table F.**

**(Control groups from Figure 6: Hepatic Tissue)**

|  | **Units** | **WT** | **WT CoPP** | **WT + SnMP** |
| --- | --- | --- | --- | --- |
| **Figure 6A** | **IR – β/actin** | **0.26 ± 0.02** | **0.24 ± 0.04** | **0.27 ± 0.05** |
| **Figure 6B** | **IR Tyr 1146/Actin** | **0.71 ± 0.05** | **0.74 ± 0.06** | **0.69 ± 0.03** |
| **Figure 6C** | **PAKT/AKT** | **1.18 ± 0.06** | **0.17 ± 0.07** | **0.18 ± 0.05** |
| **Figure 6D** | **G6Pase/Actin** | **0.44 ± 0.04** | **0.41 ± 0.05** | **0.49 ± 0.06** |
| **Figure 6E** | **FAS/Actin** | **0.31 ± 0.02** | **0.33 ± 0.04** | **0.34 ± 0.03** |
| **Figure 6F** | **aP2/Actin** | **1.01 ± 0.05** | **1.10 ± 0.06** | **1.06 ± 0.06** |

**Table G.**

**(Control groups from Figure 7: Hepatic Tissue)**

|  | **Units** | **WT** | **WT + CoPP** | **WT + SnMP** |
| --- | --- | --- | --- | --- |
| **Figure 7A** | **% Fibrosis** | **0.41 ± 0.02** | **0.48 ± 0.02** | **0.52 ± 0.03** |
| **Figure 7B** | **Plasma TNF-α (pg/ml)** | **44.1 ± 1.8** | **41.0 ± 2.5** | **42.0 ± 2.2** |
| **Figure 7C** | **MMP2/actin** | **0.14 ± 0.01** | **0.11 ± 0.03** | **0.16 ± 0.02** |
| **Figure 7D** | **TGF-β/actin** | **0.26 ± 0.02** | **0.27 ± 0.04** | **0.22 ± 0.02** |

**Table H.**

**(Control groups from Figure 8: Aorta)**

|  | **Units** | **WT** | **WT + CoPP** | **WT + SnMP** |
| --- | --- | --- | --- | --- |
| **Figure 8A** | **iNOS/actin** | **0.61 ± 0.04** | **0.69 ± 0.06** | **0.58 ± 0.10** |
| **Figure 8B** | **peNOS/actin** | **1.36 ± 0.03** | **1.33 ± 0.05** | **1.35 ± 0.04** |
| **Figure 8C** | **pAMPK/AMPK** | **0.85 ± 0.04** | **0.81 ± 0.08** | **0.86 ± 0.05** |
